# Supplementary material
Source: PubMed Central journal article supplement (PMC1176451)
Supplement: 7600722s1.pdf [file 7600722s1.pdf]

## Supplementary Information 1

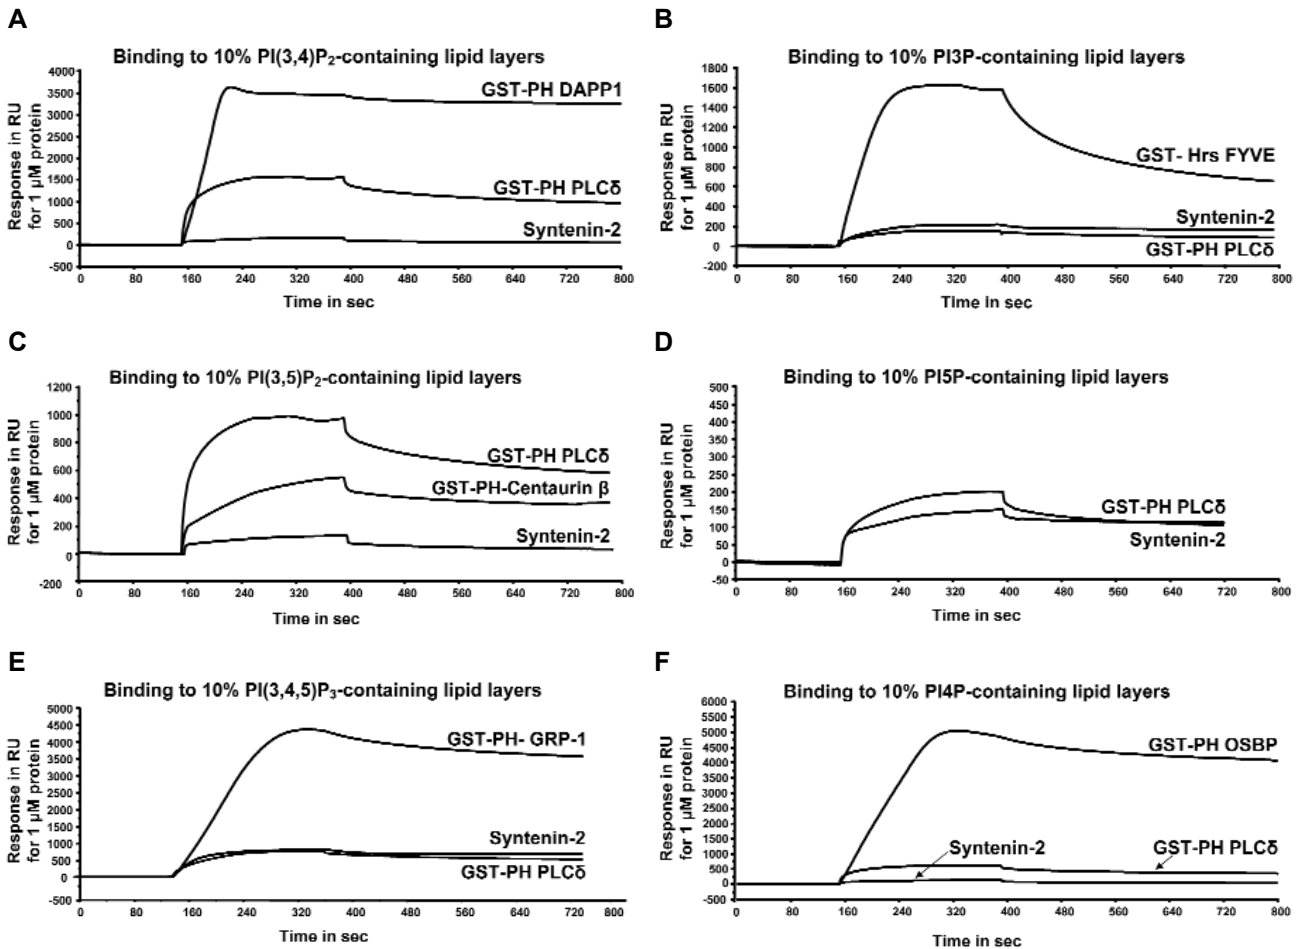

### Interaction of syntenin-2 with phosphoinositides other than PIP<sub>2</sub>

(A-F) SPR sensograms showing the interaction of syntenin-2 with lipid layers containing different phosphoinositides as indicated. Each syntenin-2 sensogram is compared to the sensogram for GST-PH-PLCδ (positive control for PIP<sub>2</sub>) and to that for a positive control for the respective phosphoinositide when available. Positive controls for each phosphoinositide; i.e. the PH domain of DAPP1 for the PI(3,4)P<sub>2</sub> (Ferguson et al, 2000), of Centaurin β2 for PI(3,5)P<sub>2</sub> (Dowler et al, 2000), of GRP-1 for PI(3,4,5)P<sub>3</sub> (Ferguson et al, 2000), of OSBP for PI(4)P (Levine and Munro, 2002), and the tandem FYVE domain of Hrs for PI(3)P (Gillooly et al, 2000) were included. Exception was for PI(5)P for which such control was not available. The purified recombinant proteins were perfused at 1 μM.

#### REFERENCES

- Dowler S, Currie RA, Campbell DG, Deak M, Kular G, Downes CP, Alessi DR (2000) Identification of pleckstrin-homology-domain-containing proteins with novel phosphoinositide-binding specificities. *Biochem J* **351**: 19-31
- Ferguson KM, Kavran JM, Sankaran VG, Fournier E, Isakoff SJ, Skolnik EY, Lemmon MA (2000) Structural basis for discrimination of 3-phosphoinositides by pleckstrin homology domains. *Mol Cell* **6**: 373-384
- Gillooly DJ, Morrow IC, Lindsay M, Gould R, Bryant NJ, Gaullier JM, Parton RG, Stenmark H (2000) Localization of phosphatidylinositol 3-phosphate in yeast and mammalian cells. *EMBO J* **19**: 4577-4588
- Levine, T.P. and Munro, S. (2002). Targeting of Golgi-specific pleckstrin homology domains involves both PtdIns 4-kinase-dependent and -independent components. *Curr Biol* **12**: 695-704
