# Supplementary material
Source: PubMed Central journal article supplement (PMC1176451)
Supplement: 7600722s2.pdf [file 7600722s2.pdf]

## Supplementary Information 2

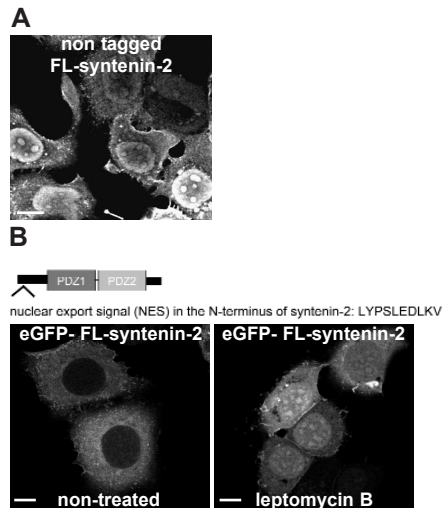

### Localization of full length (FL) syntenin-2

(A) Confocal micrograph of a MCF-7 cell showing the distribution of overexpressed non-tagged FL syntenin-2 as detected with our anti-syntenin-2 antibodies.

(B) Blocking nuclear export results in the nuclear enrichment of eGFP-FL-syntenin-2. Syntenin-2 contains a potential nuclear export signal (NES) in the N-terminal domain. For inhibition of nuclear export (Fukuda et al., 1997), cells were cultured for 1 hour in the presence 5 nM leptomycin B (Sigma, USA). MCF-7 cells expressing eGFP-FL syntenin-2 were cultured in the absence (left panel) or in the presence of leptomycin B (right panel) before confocal microscopy.

Size bars are 10  $\mu$ m.

### REFERENCE

Fukuda M, Asano S, Nakamura T, Adachi M, Yoshida M, Yanagida M, Nishida E (1997). CRM1 is responsible for intracellular transport mediated by the nuclear export signal. *Nature*, **390**: 308-311
