# Supplementary material
Source: PubMed Central journal article supplement (PMC1176451)
Supplement: 7600722s4.pdf [file 7600722s4.pdf]

## Supplementary Information 4

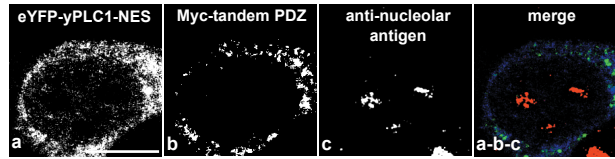

**Expression of yPLC1-NES results in the disappearance of the Myc-tandem PDZ from nucleoli but not in the disappearance of the nucleoli.**

Confocal micrograph of a MCF-7 cell expressing the eYFP-yeast PLC1 with a mutated export signal “eYFP-yPLC1-NES” and the Myc-tandem PDZ of syntenin-2 “Myc-tandem PDZ”. eYFP-yPLC1-NES was detected by eYFP fluorescence (a), the Myc-tandem PDZ using the 9E10 anti-Myc antibody (b), and nucleoli using anti-nucleolar antigen antibody (c). In the merge picture (a-b-c), PLC is in blue, tandem PDZ is in green and nucleoli are in red. Size bar is 10  $\mu\text{m}$ .
